# Supplementary material for: A highly conductive hydrogel driven by phytic acid towards a wearable sensor with freezing and dehydration resistance
Source: Royal Society of Chemistry journal article supplement (doi:10.1039/d1ta06408h), 2021-01-01
Supplement: d1ta06408h1.pdf [file d1ta06408h1.pdf]

**Highly conductive hydrogel driven by phytic acid towards wearable  
sensor with freezing and dehydration resistance**

Qin Zhang<sup>a</sup>, Xin Liu<sup>b</sup>, Jiawei Zhang<sup>b</sup>, Lijie Duan<sup>a\*</sup>, and Guanghui Gao<sup>b\*</sup>

<sup>a</sup> Polymeric and Soft Materials Laboratory, School of Chemistry and Life Science and  
Advanced Institute of Materials Science, Changchun University of Technology,  
Changchun 130012, China.

<sup>b</sup> Polymeric and Soft Materials Laboratory, School of Chemical Engineering and  
Advanced Institute of Materials Science, Changchun University of Technology,  
Changchun 130012, China.

Corresponding authors: Lijie Duan, Guanghui Gao

E-mail: [duanlijie@ccut.edu.cn](mailto:duanlijie@ccut.edu.cn); [ghgao@ccut.edu.cn](mailto:ghgao@ccut.edu.cn)

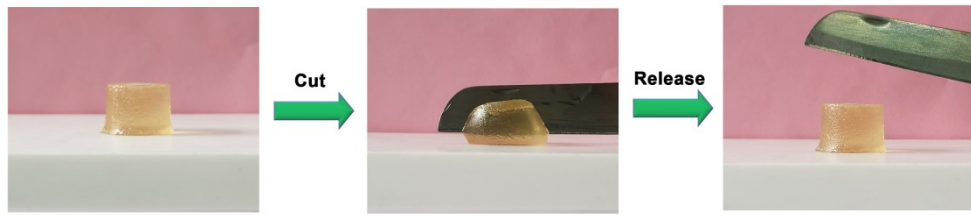

**Figure S1.** The PAM/CS-PA hydrogels (0:20) resisted the cut with a blade.

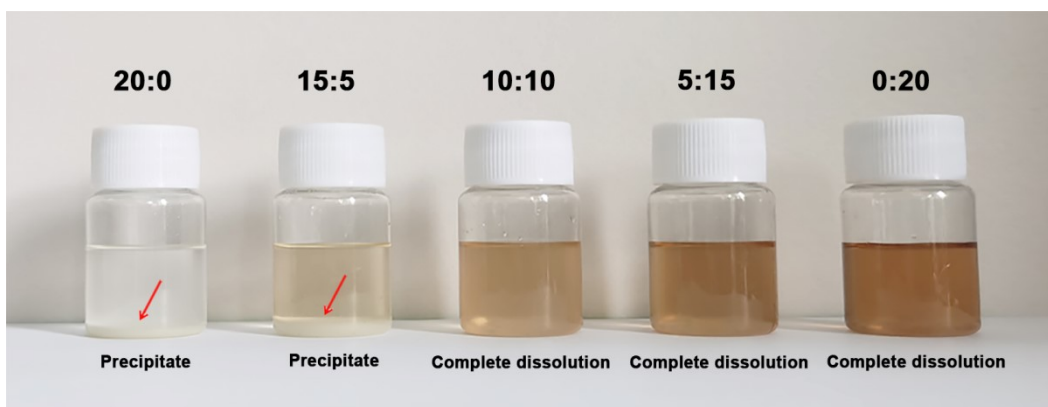

**Figure S2.** Dissolution of CS in the solvent with different volume ratios of H<sub>2</sub>O/PA.

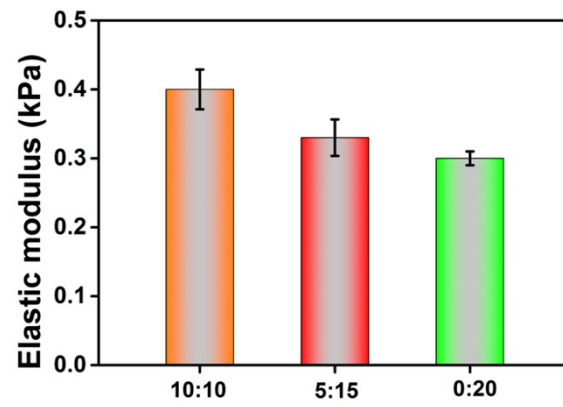

**Figure S3.** Elastic modulus of the hydrogels with different volume ratios of H<sub>2</sub>O and PA.

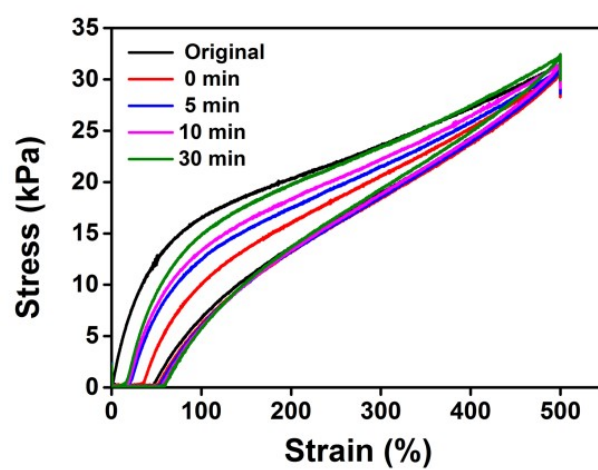

**Figure S4.** Cyclic tensile curves of hydrogel (0:20) under different recovery time at the strain of 500%.

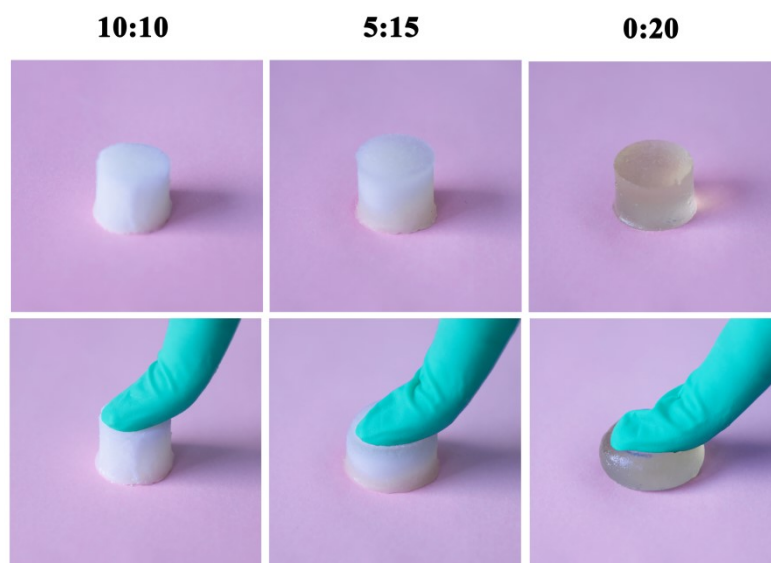

**Figure S5.** Photographs of the hydrogels with different volume ratios of H<sub>2</sub>O and PA after storage at -20 °C for 1 day.

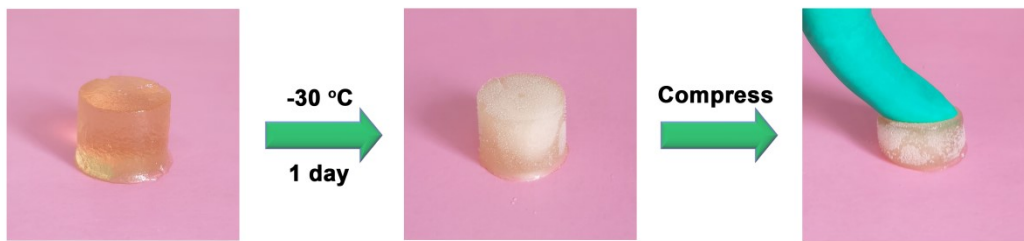

**Figure S6.** Photographs of the hydrogel (0:20) after storage at -30 °C for 1 day.

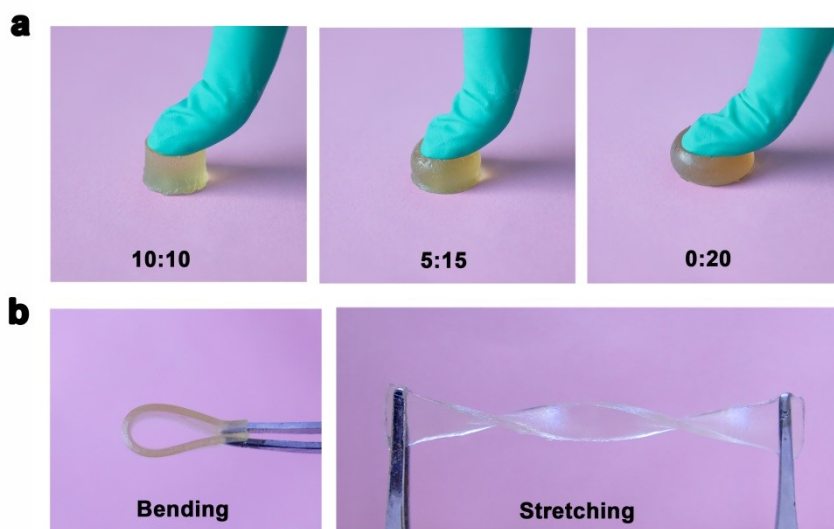

**Figure S7.** (a) Photographs of the hydrogels with different volume ratios of H<sub>2</sub>O and PA pressed by finger after storage in an open environment for 15 days. (b) Photographs of the hydrogels (0:20) under bending and stretching after storage in an open environment for 15 days.



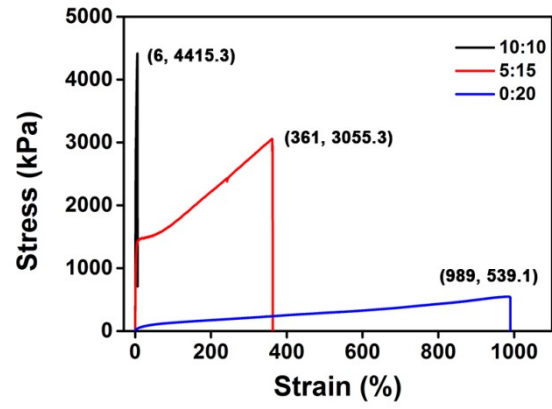

**Figure S8.** Tensile curves of hydrogels with different volume ratios of H<sub>2</sub>O and PA after storage in an open environment for 15 days.

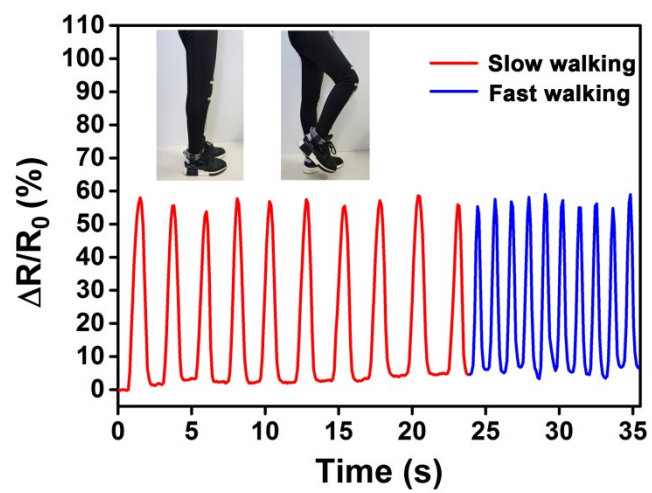

**Figure S9.** Time-dependent  $\Delta R/R_0$  of the sensor when walking with different speeds.

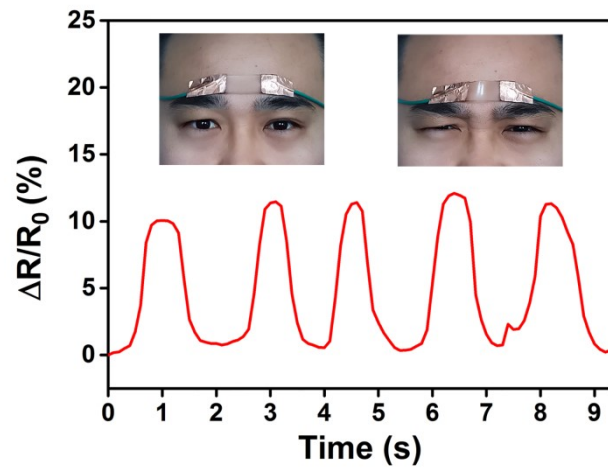

**Figure S10.** Time-dependent  $\Delta R/R_0$  of the sensor when frowning.
